# Supplementary material for: Evaluation of the WRF-Chem performance for the air pollutants over the United Arab Emirates
Source: Copernicus journal article supplement (doi:10.5194/acp-25-1685-2025), 2025-02-06
Supplement: Supplementary file 1 [file acp-25-1685-2025-supplement.pdf]

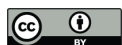

*Supplement of*

## **Evaluation of the WRF-Chem performance for the air pollutants over the United Arab Emirates**

**Yesobu Yarragunta et al.**

*Correspondence to:* Diana Francis ([diana.francis@ku.ac.ae](mailto:diana.francis@ku.ac.ae))

The copyright of individual parts of the supplement might differ from the article licence.

1 **Table S1** List of seven Automatic Weather Stations operated in airports —five land-based and two  
 2 coastal—alongside the Wind-blown Sand Experiment (WISE) site and two AERONET stations,  
 3 Mezaira and Dewa, for AOD assessment in the United Arab Emirates (UAE).

| Station Name   | Metar code | Latitude | Longitude | Elevation (m) | Region  |
|----------------|------------|----------|-----------|---------------|---------|
| WISE-UAE       | WISE       | 23.58    | 53.72     | 119           | Land    |
| Abu Dhabi      | OMAA       | 24.43    | 54.65     | 27            | Land    |
| Abu Dhabi      | OMAD       | 24.43    | 54.46     | 3             | Coastal |
| Al Maktoum     | OMDW       | 24.90    | 55.16     | 19            | Land    |
| Dubai          | OMDB       | 25.25    | 55.37     | 5             | Coastal |
| Sharjah        | OMSJ       | 25.33    | 55.52     | 33            | Land    |
| Al Ain         | OMAL       | 24.26    | 55.61     | 262           | Land    |
| Ras Al Khaimah | OMRK       | 25.61    | 55.94     | 31            | Land    |
| Mezaira        |            | 23.11    | 54.76     | 201           | Land    |
| Dewa           |            | 24.77    | 55.37     | 88            | Land    |

4

5 The WRF-Chem model effectively represents the observed variability in T2m, RH2m, and  
 6 WS10m across all seven meteorological stations during June and December 2022. An

7 inspection of Table S2 reveals the WRF-Chem model generally overestimates the observed  
8 T2m values by less than 0.8 °C in June and underestimates in December by less than 5.2 °C  
9 across most locations. Previous studies revealed a cold bias, more pronounced in the summer  
10 months (e.g., Branch et al., 2021; Chaouch et al., 2017; Fonseca et al., 2020; Temimi et al.,  
11 2020), which has been attributed to an incorrect representation of the aerosol loading,  
12 greenhouse gas concentrations and surface properties (e.g., very high surface emissivity values,  
13 as noted in Parajuli et al., 2023), and deficiencies in the physics schemes, in particular in the  
14 land surface, PBL and radiation schemes. The fact that the temperature bias is positive in the  
15 summer, and of a much reduced magnitude compared to that reported in other studies where it  
16 exceeds 3 °C (Branch et al., 2021; Temimi et al., 2020), stresses the importance of correctly  
17 representing the aerosol loading in this region, as noted by Fonseca et al. (2021). Correlation  
18 coefficients for the observed T2m with model simulations are between 0.81 and 0.85 in June,  
19 slightly decreasing to a range of 0.79 to 0.81 in December. Lower correlation values in the  
20 December month likely arise from an incorrect simulation of the timing of the passage of mid-  
21 latitude baroclinic systems, which largely control the weather conditions in the region during  
22 the colder months (Nelli et al., 2022). The fact that even at 3 km the model will not be able to  
23 fully capture the complex land-sea mask may justify the slightly lower correlation values at  
24 coastal sites when compared to inland stations, as noted by Abida et al. (2022). The WS10m  
25 biases are also lower than those reported in other studies, typically by a factor of two to three,  
26 suggesting an overall improved representation of the boundary layer dynamics. As this field  
27 exhibits a more pronounced spatial and temporal variability compared to T2m, the correlation  
28 coefficients will be lower, with values in the range 0.3-0.4. The dry bias, noted by virtually all  
29 previous modeling studies in the region and more pronounced in the summer months (e.g.,  
30 Branch et al., 2021; Temimi et al., 2020), is also present with this model configuration. Possible  
31 explanations include deficiencies in the representation of the soil moisture, which plays an  
32 important role in driving the atmospheric dynamics in the region (e.g. Francis et al., 2021;  
33 Wehbe et al., 2019), and an incorrect representation of the mesoscale land-sea breeze  
34 circulations (Fonseca et al., 2022; Gopalakrishnan et al., 2023; Temimi et al., 2020).

35 **Table S2 Statistical evaluation against UAE Airport station data:** skill scores for air  
36 temperature at 2m (T2m), wind speed at 10m (WS10m), and Relativity humidity at 2m (RH2m)  
37 for seven airport stations (categorized into land and coastal regions) over the UAE listed in  
38 Table S1.

| Parameter   | Month | Region  | MOD   | OBS   | MB     | MAE   | RMSE  | R    |
|-------------|-------|---------|-------|-------|--------|-------|-------|------|
| T2m (°C)    | June  | Land    | 35.65 | 35.50 | 0.16   | 3.67  | 4.52  | 0.85 |
|             |       | Coastal | 35.66 | 35.42 | 0.24   | 4.48  | 5.34  | 0.81 |
|             | Dec   | Land    | 19.03 | 22.36 | -3.32  | 3.90  | 4.65  | 0.86 |
|             |       | Coastal | 19.04 | 24.12 | -5.07  | 5.54  | 6.53  | 0.79 |
| WS10m (m/s) | June  | Land    | 3.98  | 4.03  | -0.05  | 2.03  | 2.58  | 0.25 |
|             |       | Coastal | 3.98  | 3.54  | 0.43   | 1.74  | 2.18  | 0.36 |
|             | Dec   | Land    | 3.55  | 3.08  | 0.47   | 1.50  | 1.89  | 0.34 |
|             |       | Coastal | 3.55  | 3.06  | 0.49   | 1.43  | 1.78  | 0.42 |
| RH2m (%)    | June  | Land    | 17.69 | 40.71 | -23.02 | 25.32 | 29.77 | 0.36 |
|             |       | Coastal | 17.68 | 46.96 | -29.28 | 31.21 | 35.48 | 0.29 |
|             | Dec   | Land    | 52.32 | 62.44 | -10.12 | 15.70 | 19.11 | 0.63 |
|             |       | Coastal | 52.29 | 59.06 | -6.78  | 14.60 | 17.88 | 0.57 |

39

40 The WRF-Chem model performance has also been evaluated against WISE-UAE  
41 measurements for T2m, RH2m, WS10m, and SW for December 2022 (the experiment initiated  
42 in July 2022 so no data for June 2022), with the skill scores summarized in Table S3. By and  
43 large the model performance is similar to that found for the airport stations in Table S2. In  
44 particular, there is an underestimation of T2m by about 1.6 °C, and a slight overestimation of

45 WS10m by 0.78 m/s, and a negative bias in RH2m by about -17%. The higher correlation  
 46 values at this inland barren site indicate a superior model skill in capturing the diurnal cycle in  
 47 a rural environment as opposed to major urban airport areas, whose complexity will not be  
 48 fully represented in WRF-Chem. The WRF model has shown a tendency to overestimate the  
 49 observed wind speed across the country over all seasons (e.g., Branch et al. 2021; Fonseca et  
 50 al. 2020, 2021, 2022b; Temimi et al., 2020), which has been put down to an incorrect  
 51 representation of its subgrid-scale variability and deficiencies in the surface drag  
 52 parameterization scheme. Additionally, the model overestimates SW by 29 W/m<sup>2</sup>, even though  
 53 it captures very well its diurnal cycle, as evident by the high correlation coefficient of 0.94.  
 54 The positive bias in SW may be attributed to an underprediction of the observed cloud cover,  
 55 as noted by Wehbe et al. (2019) and Fonseca et al. (2020, 2022a), which is the highest in the  
 56 region in the colder months (Yousef et al., 2020).

57 **Table S3 Statistical evaluation against WISE-UAE measurements:** Skill scores for 2-meter  
 58 air temperature (T2m), 10-meter wind speed (WS10m), 2-meter relative humidity (RH2m),  
 59 and downward shortwave radiation flux (SW) at the WISE-UAE location in the UAE.

| Parameter              | MOD    | OBS    | MB     | MAE   | RMSE  | R    |
|------------------------|--------|--------|--------|-------|-------|------|
| T2m (°C)               | 18.74  | 20.34  | -1.60  | 2.19  | 2.66  | 0.94 |
| WS10m (m/s)            | 3.56   | 2.78   | 0.78   | 1.52  | 1.82  | 0.59 |
| RH2m (%)               | 52.75  | 69.62  | -16.87 | 18.21 | 21.94 | 0.76 |
| SW (W/m <sup>2</sup> ) | 204.13 | 174.91 | 29.22  | 57.33 | 98.61 | 0.94 |

60

61 A more detailed analysis is presented in Fig. S1(a), which shows the average diurnal variation  
 62 in T2m from WRF-Chem simulations and observations for December 2022. The negative T2m  
 63 bias seen in Table S3 arises mostly from cold nighttime temperatures, Fig. S1(a), as noted  
 64 before and reported in previous studies (e.g., Abida et al., 2022; Branch et al., 2021; Fonseca  
 65 et al., 2021; Schwitalla et al., 2020; Temimi et al., 2020), with the daytime temperatures

66 simulated well by the model, generally within 1 °C. The sharp drop between 14-15 UTC (18-  
67 19LT) occurs around the sunset, Fig. S1(d), at a time when the model's underestimation of the  
68 observed RH2m becomes more pronounced exceeding 20%, Fig. S1(c), and just before it starts  
69 overestimating the strength of the observed wind speed, Fig. S1(c). This is consistent with a  
70 stronger offshore flow in WRF-Chem, advecting the cooler and drier inland air into the WISE-  
71 UAE site.

72 Fig. S1(b) shows an overestimation of the observed wind speed at night, by up to 2 m/s, and a  
73 slight underestimation during daytime, by up to 1 m/s, indicating deficiencies in the  
74 representation of the nighttime PBL, as noted by Chaouch et al. (2017), Temimi et al. (2020)  
75 and Abida et al. (2022). The dry bias is more pronounced during nighttime hours, Fig. S1(c),  
76 arising from increased advection of drier air from the inland desert owing to a more offshore  
77 wind direction in the model (not shown). The underestimation of the observed cloud cover is  
78 evident in Fig. S1(d) by the smaller variability of the model-predicted SW and the  
79 overestimation of the observed magnitude by up to 100 W/m<sup>2</sup>, the latter also reflecting  
80 deficiencies in the radiation scheme and an incorrect representation of the aerosol loading and  
81 greenhouse gas concentrations. The 1-h lag between the observed and WRF-Chem SW diurnal  
82 cycle has been noted by Weston et al. (2018). It may be explained by discrepancies between  
83 the modelled and observed aerosol loading, greenhouse gas concentration, surface properties  
84 and topography.

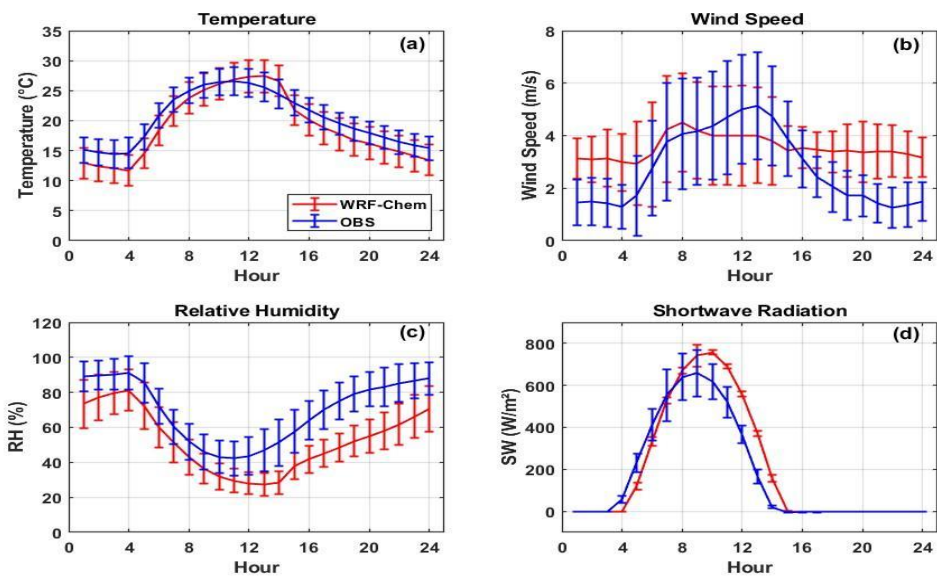

85

86 **Figure S1: WRF-Chem Evaluation at WISE-UAE Site for December 2022:** Diurnal cycle  
87 of monthly-mean values for WRF-Chem simulated (red) and observed (blue) air temperature  
88 at 2m (T2m, °C) in (a), wind speed at 10m (WS10m, m/s) in (b), relative humidity at 2m  
89 (RH2m, %) in (c), and downward shortwave radiation flux (SW, W/m<sup>2</sup>) in (d), for December  
90 2022. The averaged spatial standard deviation is represented by error bars at each hour.

91

92 In Fig. S2, a spatial comparison is presented between the averaged ERA5 T2m and the  
93 corresponding WRF-chem simulation output across the simulation domain during June and  
94 December of 2022. The model adeptly captures regional temperature variations, displaying an  
95 underestimation in the south-western regions typically by 1-3°C and an overestimation in the  
96 north-eastern region of the UAE, by less than 1°C (Figs. S2(a)-(c) and (e)-(g)). A comparison  
97 with the statistics against the airport stations (Table S2) and the WISE-UAE field  
98 measurements (Table S3; Fig. S1) suggests the reanalysis dataset gives a good representation  
99 of the observed air temperature in both months, which has been noted by Nelli et al. (2024).  
100 WRF-Chem underestimates the area-averaged temperature (T2m) over the UAE compared to  
101 ERA5 in both seasons, Figs. S2(d) and (h). This is in contrast with the evaluation against the  
102 airport station data, which indicates an overestimation during the summer and an  
103 underestimation during the winter (Table S2). Kishta et al., (2023) reported minor  
104 discrepancies in temperature measurements between the observational data and ERA5  
105 reanalysis, identifying a strong correlation coefficient of 0.89 over Abu Dhabi. This is further  
106 confirmed by Nelli et al. (2024), who found air temperature biases not exceeding 0.7 °C and  
107 correlation coefficients not lower than 0.92 for all seasons. The spatial average of the WRF-  
108 Chem and ERA5 values are 33.1 °C and 34.0 °C, respectively, with an underestimation of 1°C  
109 over the UAE. The model displays a high correlation (r) of 0.97 and a RMSE of 0.8 °C, MAE  
110 of 1.1 °C in June. For December, the model shows a similar pattern, with an underestimation  
111 of 0.9 °C, which is slightly lower compared to June, an r value of 0.92, a MAE of 1.0 °C and a  
112 RMSE of 1.1 °C (Table S4).

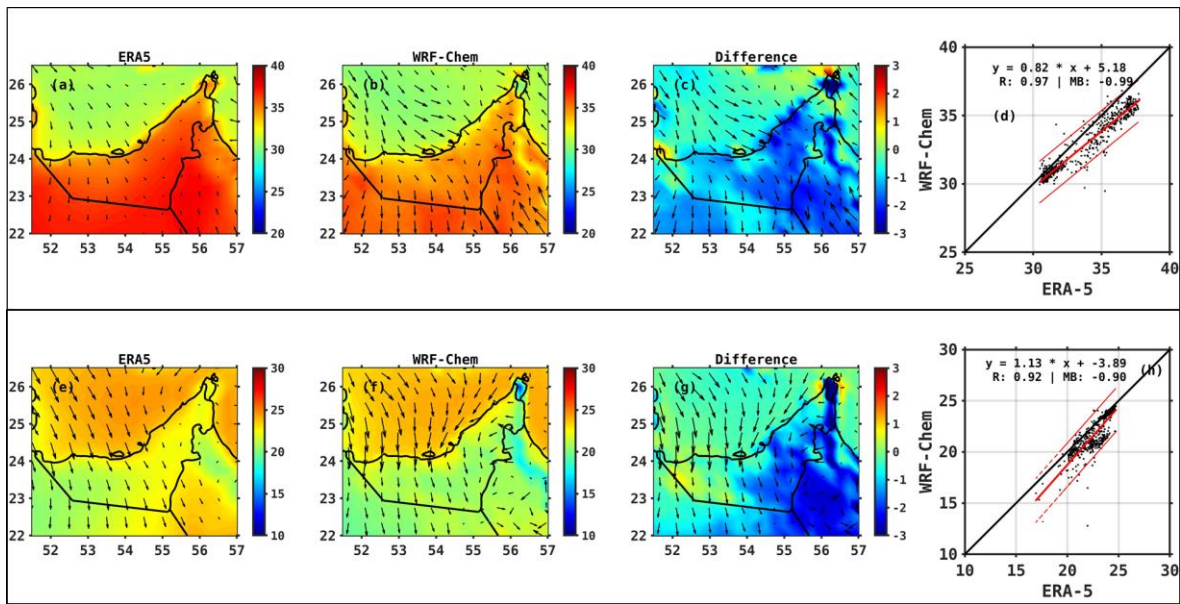

113

114 **Figure S2: ERA-5 and WRF-Chem Air Temperature:** Average 2-m air temperature (°C) obtained  
 115 from ERA5 reanalysis (a,e), simulated by WRF-Chem (b,f), the corresponding absolute differences  
 116 (c,g), and scatter plots between the two datasets (d,h) during June (top) and December (bottom) 2022.  
 117 The 10m wind vectors are overlaid on the corresponding spatial plots.

118 It is widely recognized that the Planetary boundary layer (PBL) plays a crucial role in the  
 119 advection and dispersion of pollution over the region (Phanikumar et al., 2020). The PBL is  
 120 deeper during summer and shallower in winter (Nelli et al., 2021). There are noticeable  
 121 differences in the PBL between land areas (approximately 2400–2500 m) and marine regions  
 122 (about 1200–1500 m), as expected given the contrasting thermal inertia between the ocean  
 123 water and the land surface . Basha et al. (2019) discovered that ERA-Interim reanalysis data  
 124 tends to underestimate the PBL depth when compared with data obtained from Global  
 125 Positioning System Radio Occultation (GPSRO) in most regions and in all the seasons. Chen  
 126 et al. (2022) emphasized the critical role of the boundary layer in influencing air quality and  
 127 facilitating the transboundary transport of pollutants. The authors noted that a deeper boundary  
 128 layer enhances the potential for pollutant transport to the Tibetan Plateau. Wang et al. (2022)  
 129 highlighted the critical role of meteorological conditions in severe PM<sub>2.5</sub> pollution episodes,  
 130 stressing that rapid cold air advection can quickly disperse pollutants, in contrast to the slow  
 131 accumulation of pollutants under weak high-pressure systems. This slow build-up is  
 132 characterized by low wind speeds, and low atmospheric boundary layer heights, which lead to  
 133 prolonged heavy pollution periods and potentially fog events given the aerosols' role in acting  
 134 as cloud condensation nuclei (Pauli et al., 2024).



135 Fig. S3 shows a comparison of the mean ERA5 PBL with corresponding WRF-chem simulated  
 136 values for the months of June and December 2022. The spatial distribution of PBL across the  
 137 UAE, with higher values over land regions and lower values over the marine regions in the  
 138 summer, Figs. 3(a)-(b), and the opposite in winter, Figs. 3(e)-(f), is seen in both ERA5 and  
 139 WRF-Chem, and is consistent with the seasonal temperature variations (cf. Figs S2(a)-(b) and  
 140 (e)-(f)). In particular, warmer summer temperatures contribute to an elevation in PBL, and  
 141 cooler winter temperatures are accompanied by lower PBL heights (Basha et al., 2019). It is  
 142 surprising that over the Arabian Gulf the PBL is deeper in December than in June, cf. Figs.  
 143 S3(a)-(b) but (e)-(f). This arises because of increased wind speeds and turbulent mixing in the  
 144 colder months, which drive deeper PBLs (Dai, 2024). In terms of the model simulated PBL  
 145 depths (averaged spatially for the UAE), WRF-Chem exhibits good performance in capturing  
 146 the regional variations seen in the reanalysis dataset. In June, the modelled PBL is at 657 m  
 147 compared to 606 m in ERA5, with a correlation coefficient of 0.98 and a RMSE of 232 m. In  
 148 December, the modelled PBL is 516 m compared to the ERA5 of 526 m, with a high correlation  
 149 coefficient of 0.98 and an RMSE of 136 m (Table S4). The good agreement between the WRF-  
 150 Chem and ERA5's PBL depth suggests the model is capable of simulating the spatial and  
 151 temporal variability of the PBL across the UAE in both seasons.

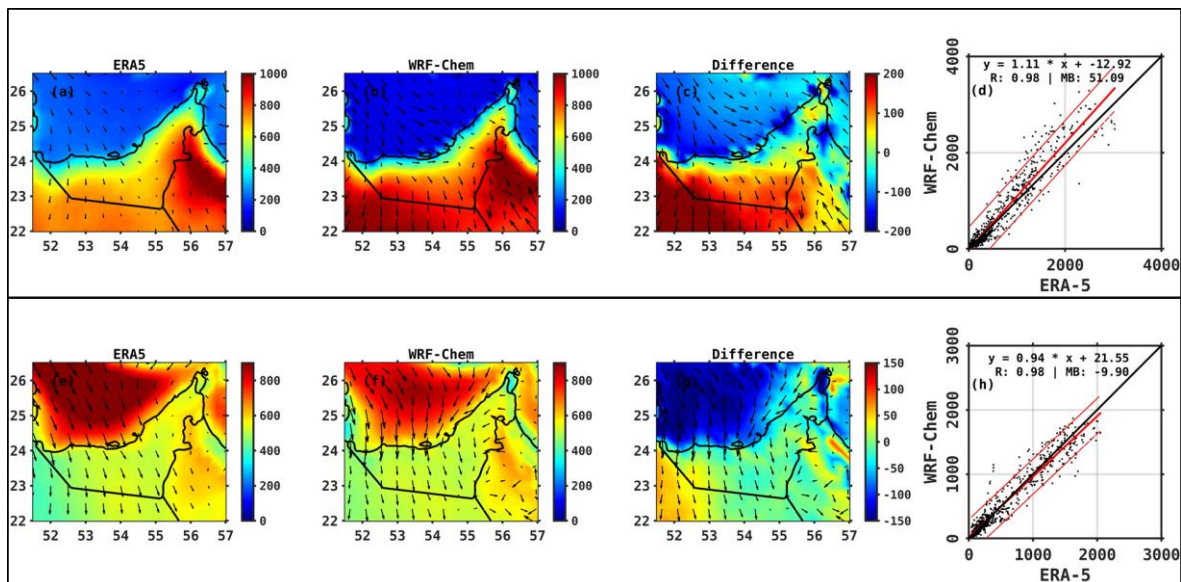

152  
 153 **Figure S3: ERA-5 and WRF-Chem Boundary Layer Height:** Same as Fig. S2, but for the  
 154 planetary boundary layer (PBL) height.

155 In addition to T2m and PBL, Table S4 also summarizes the spatially averaged statistical  
 156 verification scores for WS10m and SR over UAE. Regarding WS10m, it is accurately

157 simulated by the model with small differences in MB (June: 0.6 m/s, Dec: 0.4 m/s), which are  
 158 largely comparable to those obtained at the location of the airport stations (Table S2) and  
 159 WISE-UAE location (Table S3), with good correlations in both seasons (June: 0.51, Dec: 0.88).  
 160 This suggests the reanalysis dataset also overestimates the strength of the wind speed in the  
 161 region, as noted by Nelli et al. (2024). These biases have been attributed to an incorrect  
 162 representation of the near-surface wind subgrid-scale variability and deficiencies in the surface  
 163 drag parameterization scheme employed in the model (Nelli et al., 2020; Temimi et al., 2020).  
 164 The excessive SW in WRF-Chem seen with respect to the WISE-UAE field measurements  
 165 (Table S4) is also seen with respect to ERA5 data in Table S5, with the reanalysis also  
 166 exhibiting a tendency to overpredict the net shortwave radiation flux (Nelli et al., 2024). In any  
 167 case, these results presented in Figs. S1-S3 and Tables S2-S4 indicate a very good performance  
 168 of the WRF-chem model in simulating meteorological parameters over the UAE during the  
 169 specified months with respect to both *in situ* observations and a state-of-the-art reanalysis  
 170 dataset. Since WRF-Chem simulates meteorology and chemistry simultaneously, accurate  
 171 meteorological simulations are crucial for the precise computation of chemistry fields within  
 172 the model domain.

173 **Table S4 Statistical evaluation against ERA-5 data:** skill scores calculated for model simulations for  
 174 air temperature at 2m (T2m), wind speed at 10m (WS10m), downward shortwave radiation flux (SW),  
 175 and planetary boundary layer (PBL) during June and December of 2022 over the UAE.

| Parameter              | Month | MOD   | ERA5  | MB    | MAE  | R    | RMSE |
|------------------------|-------|-------|-------|-------|------|------|------|
| T2m (° C)              | June  | 33.06 | 34.04 | -0.99 | 1.05 | 0.97 | 0.78 |
|                        | Dec   | 21.87 | 22.76 | -0.90 | 0.95 | 0.92 | 1.06 |
| WS10m (m/s)            |       | 4.29  | 3.72  | 0.57  | 0.63 | 0.51 | 0.53 |
|                        |       | 3.88  | 3.46  | 0.42  | 0.53 | 0.88 | 0.60 |
| SW (W/m <sup>2</sup> ) |       | 350.2 | 309.0 | 41.3  | 41.3 | 0.94 | 1.9  |
|                        |       | 188.1 | 172.2 | 15.9  | 15.9 | 0.99 | 2.6  |

|         |  |       |       |       |       |      |       |
|---------|--|-------|-------|-------|-------|------|-------|
| PBL (m) |  | 656.8 | 605.8 | 51.1  | 101.8 | 0.98 | 231.9 |
|         |  | 516.0 | 525.9 | -10.0 | 91.2  | 0.98 | 136.3 |

176

177

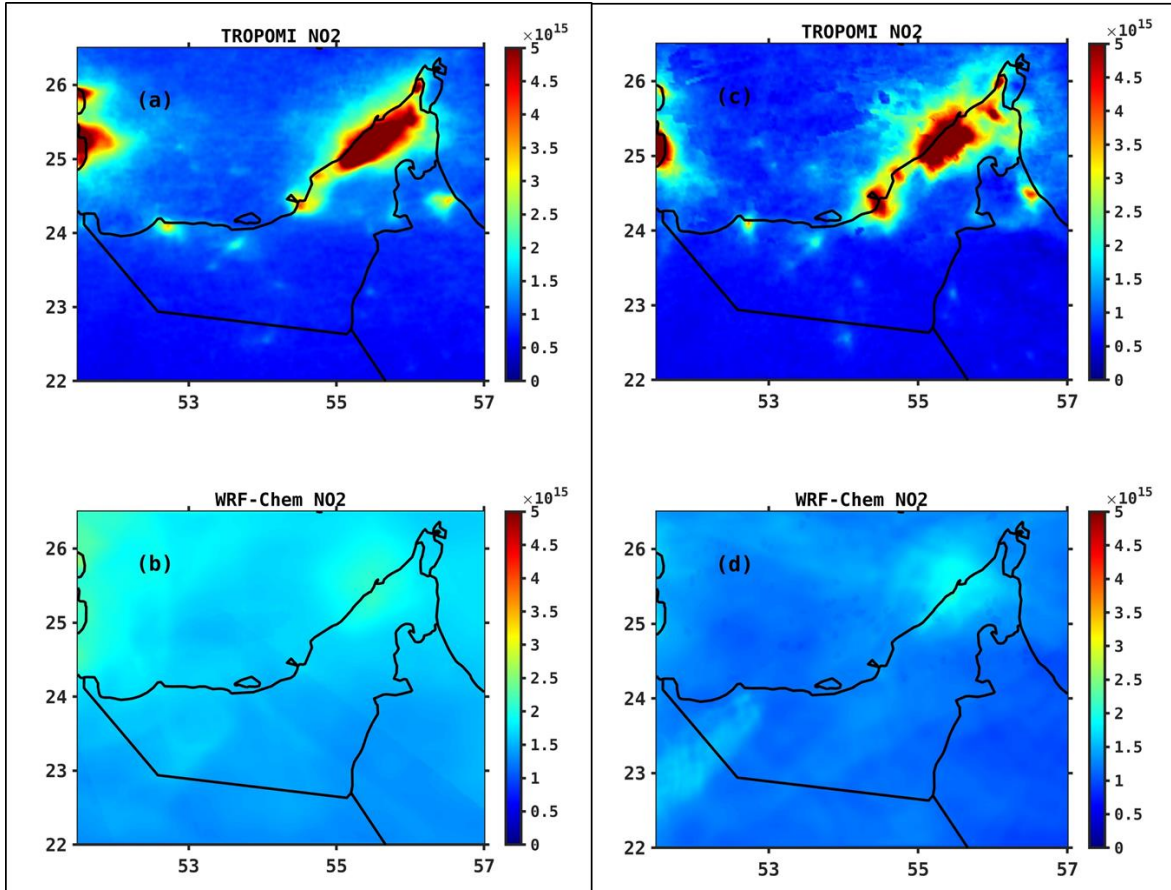

178

179 **Figure S4: The tropospheric column NO<sub>2</sub> from TROPOMI and WRF-Chem:** Spatial  
 180 distribution of tropospheric column NO<sub>2</sub> over the UAE as observed by TROPOMI and  
 181 simulated by the WRF-Chem model during the summer (a,b) and winter (c,d) of 2022.

182

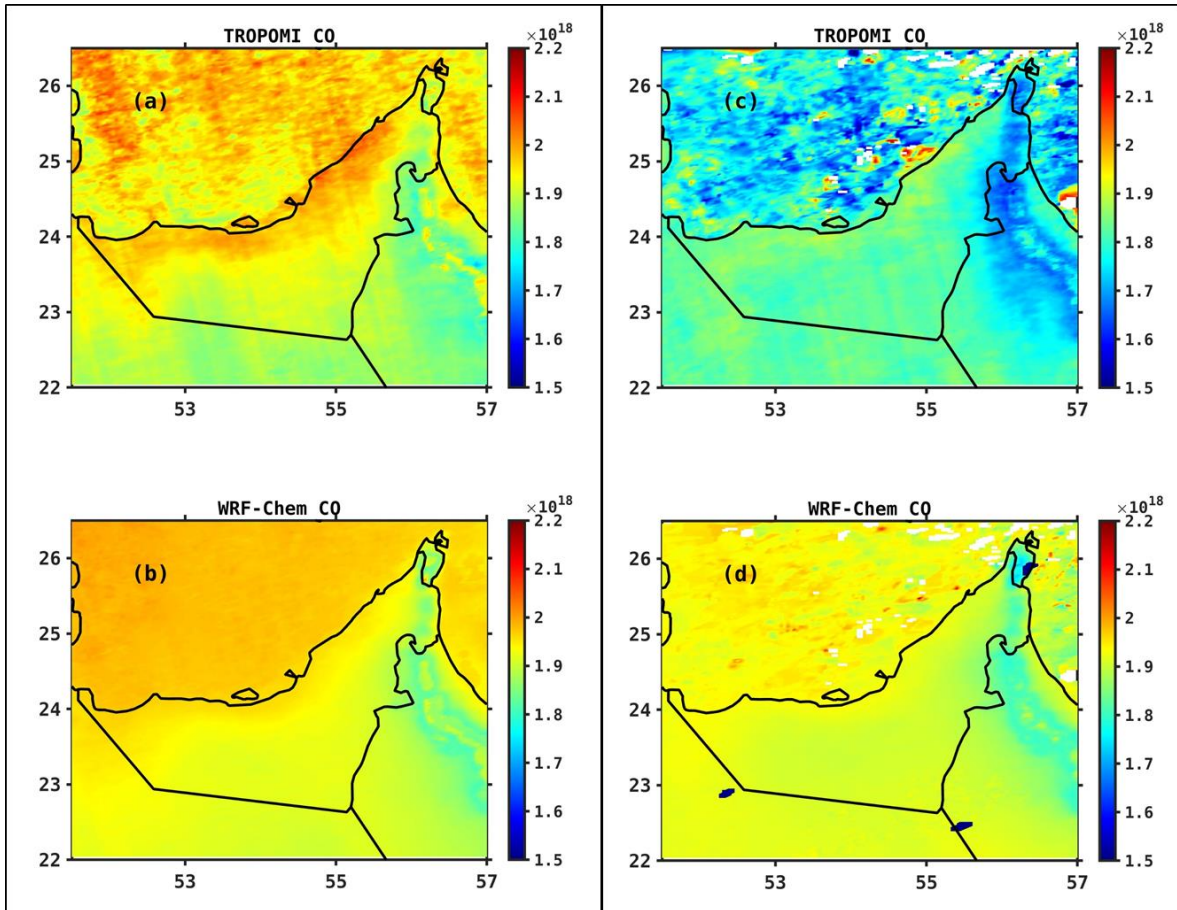

183

184 **Figure S5: The total column CO from TROPOMI and WRF-Chem: Same as Fig. S4, but**  
 185 **for total column CO.**

186

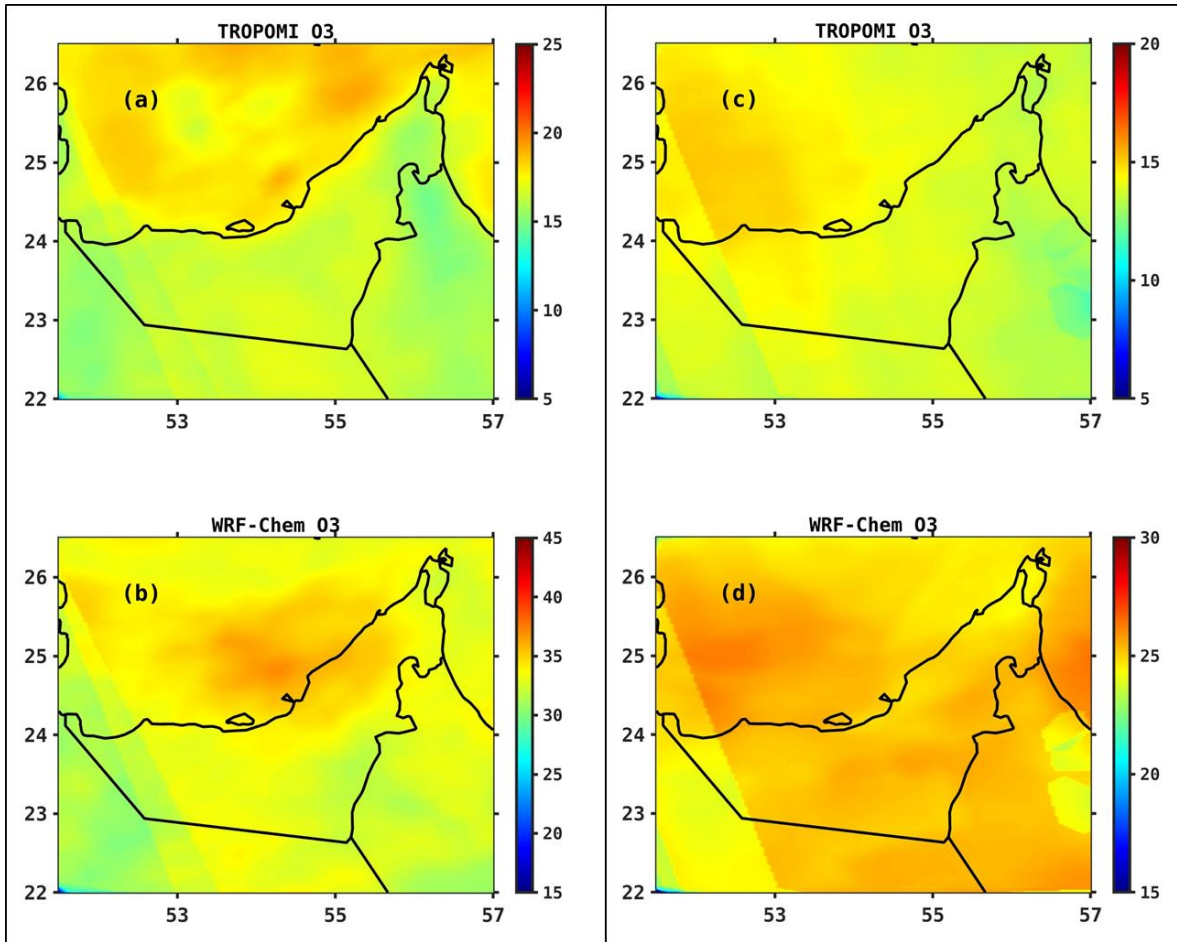

187

188 **Figure S6: The tropospheric column ozone from TROPOMI and WRF-Chem:** Similar to  
 189 Figure S3, but for tropospheric column ozone. Note the differences in color scales between  
 190 TROPOMI and WRF-Chem for both summer and winter.

191



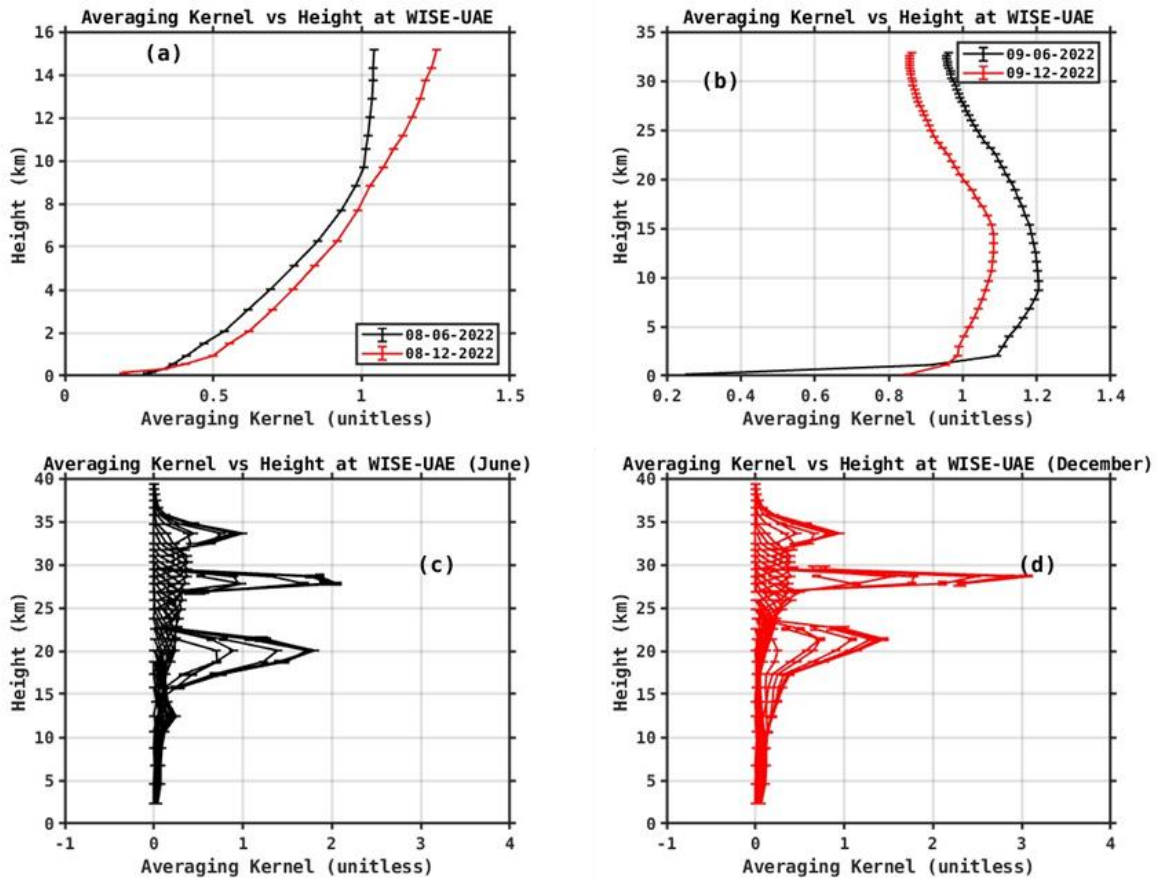

192

193 **Figure S7: The averaging kernel from TROPOMI:** (a) for tropospheric column NO<sub>2</sub>  
 194 (example days for June (black) and December (red)). (b) for total column CO (example days  
 195 for June (black) and December (red)), (c), and (d) for ozone averaging kernel profile for June  
 196 and December, respectively. Note the differences in color scales.

197

198

199

200

201

202

203

204

205

206

207

208

209

## 210 **References**

- 211 Abida, R., Addad, Y., Francis, D., Temimi, M., Nelli, N., Fonseca, R., Nesterov, O., & Bosc, E.: Evaluation  
212 of the Performance of the WRF Model in a Hyper-Arid Environment: A Sensitivity Study.  
213 *Atmosphere*, 13(6). <https://doi.org/10.3390/atmos13060985-2022>, 2022.
- 214 Basha, G., Kishore, P., Ratnam, M. V., Ravindra Babu, S., Velicogna, I., Jiang, J. H., & Ao, C. O. (2019).  
215 Global climatology of planetary boundary layer top obtained from multi-satellite GPS RO  
216 observations. *Climate Dynamics*, 52(3–4), 2385–2398. [https://doi.org/10.1007/s00382-018-](https://doi.org/10.1007/s00382-018-4269-1-2019)  
217 [4269-1-2019](https://doi.org/10.1007/s00382-018-4269-1-2019), 2019.
- 218 Branch, O., Schwitalla, T., Temimi, M., Fonseca, R., Nelli, N., Weston, M., Milovac, J., & Wulfmeyer, V.:  
219 Seasonal and diurnal performance of daily forecasts with WRF V3.8.1 over the United Arab  
220 Emirates. *Geoscientific Model Development*, 14(3), 1615–1637. [https://doi.org/10.5194/gmd-](https://doi.org/10.5194/gmd-14-1615-2021)  
221 [14-1615-2021](https://doi.org/10.5194/gmd-14-1615-2021), 2021.
- 222 Chaouch, N., Temimi, M., Weston, M., & Ghedira, H.: Sensitivity of the meteorological model WRF-  
223 ARW to planetary boundary layer schemes during fog conditions in a coastal arid region.  
224 *Atmospheric Research*, 187, 106-127. <https://doi.org/10.1016/j.atmosres.2016.12.009-2017>,  
225 2017.
- 226 Chen, Y., Chen, S., Zhao, D., Li, J., Bi, H., Lou, G., & Guan, Y.: The role of boundary layer height in India  
227 on transboundary pollutions to the Tibetan Plateau. *Science of the Total Environment*, 837.  
228 <https://doi.org/10.1016/j.scitotenv.2022.155816-2022>, 2022.
- 229 Fonseca, R., Temimi, M., Thota, M. S., Nelli, N. R., Weston, M. J., Suzuki, K., Uchida, J., Kumar, K. N.,  
230 Branch, O., Wehbe, Y., Al Hosari, T., Al Shamsi, N., & Shalaby, A.: On the analysis of the  
231 performance of WRF and nicam in a hyperarid environment. *Weather and Forecasting*, 35(3),  
232 891–919. <https://doi.org/10.1175/WAF-D-19-0210.1-2020>, 2020.
- 233 Fonseca, R., Francis, D., Weston, M., Nelli, N., Farah, S., Wehbe, Y., Alhosari, T., Teixido, O., &  
234 Mohamed, R.: Sensitivity of summertime convection to aerosol loading and properties in the  
235 United Arab Emirates. *Atmosphere*, 12(12). <https://doi.org/10.3390/atmos12121687-2021>,  
236 2021.
- 237 Fonseca, R., Francis, D., Nelli, N., Farrah, S., Wehbe, Y., Al Hosari, T., & Al Mazroui, A.: Assessment of  
238 the WRF model as a guidance tool into cloud seeding operations in the United Arab Emirates.  
239 *Earth and Space Science*, 9, e2022EA002269. <https://doi.org/10.1029/2022EA002269-2022>,  
240 2022a.
- 241 Fonseca, R., Francis, D., Nelli, N., & Thota, M.: Climatology of the heat low and the intertropical  
242 discontinuity in the Arabian Peninsula. *International Journal of Climatology*, 42(2), 1092–1117.  
243 <https://doi.org/10.1002/joc.7291-2022>, 2022b.
- 244 Francis, D., Temimi, M., Fonseca, R., Nelli, N. R., Abida, R., Weston, M., Wehbe, Y.: On the analysis of  
245 a summertime convective event in a hyperarid environment. *Quarterly Journal of the Royal*  
246 *Meteorological Society*, 147, 501-525. <https://doi.org/10.1002/qj.3930-2021>, 2021.
- 247 Gopalakishnan, D., Taraphdar, S., Pauluis, O. M., Xue, L., Ajayamohan, R. S., Al Shamsi, N., Chen, S.,  
248 Lee, J. A., Grabowski, W. W., Liu, C., Tessendorf, S. A., Rasmussen, R. M.: Anatomy of a  
249 Summertime Convective Event over the Arabian Region. *Monthly Weather Review*, 151, 989-  
250 1004. <https://doi.org/10.1175/MWR-D-22-0082.1-2023>, 2023.

251 Kishta, M., Al Abadla, Z., Wahab, M. M. A., & Aldashti, H.: Assessment of Heat Wave Indexing and  
252 Performance of ERA5 in Simulating Temperature and Precipitation Dataset over the UAE.  
253 *Environment Asia*, 16(2), 48–65. <https://doi.org/10.14456/ea.2023.20-2023>, 2023.

254 Nelli, N. R., Temimi, M., Fonseca, R. M., Weston, M. J., Thota, M. S., Valappil, V. K., Branch, O.,  
255 Wulfmeyer, V., Wehbe, Y., Al Hosary, T., Shalaby, A., Al Shamsi, N., & Al Naqbi, H.: Impact of  
256 roughness length on WRF simulated land-atmospheres interactions over a hyper-arid region.  
257 *Earth and Space Science*, 7, e2020EA001165. <https://doi.org/10.1029/2020EA001165-2020>,  
258 2020.

259 Nelli, N., Fissehaye, S., Francis, D., Fonseca, R., Temimi, M., Weston, M., Abida, R., & Nesterov, O.:  
260 Characteristics of Atmospheric Aerosols Over the UAE Inferred From CALIPSO and Sun  
261 Photometer Aerosol Optical Depth. *Earth and Space Science*, 8(6).  
262 <https://doi.org/10.1029/2020EA001360-2021>, 2021.

263 Nelli, N., Francis, D., Fonseca, R., Bosc, E., Addad, Y., Temimi, M., Abida, R., Weston, M., Cherif, C.:  
264 Characterization of the atmospheric circulation near the Empty Quarter Desert during major  
265 weather events. *Frontiers in Environmental Science*, 10, 972380.  
266 <https://doi.org/10.3389/fenvs.2022.972380-2022>, 2022.

267 Nelli, N., Francis, D., Alkatheeri, A., & Fonseca, R.: Evaluation of Reanalysis and Satellite Products  
268 against Ground-Based Observations in a Desert Environment. *Remote Sensing*, 16, 3593.  
269 <https://doi.org/10.3390/rs16193593-2024>, 2024.

270 Parajuli, S. P., Stenchikov, G. L., Ukhov, L., Morrison, H., Shevchenko, I., & Mostamandi, S.: Simulation  
271 of a Dust-And-Rain Event Across the Red Sea Using WRF-Chem. *Journal of Geophysical Research:*  
272 *Atmospheres* 128 (14). <https://doi.org/10.1029/2022JD038384-2023>, 2023.

273 Pauli, E., Cermak, J., Bendix, J., Stier, P.: Synoptic scale controls and aerosol effects on fog and low  
274 stratus life cycle processes in Po valley, Italy. *Geophysical Research Letters*, 51, e2024GL111490.  
275 <https://doi.org/10.1029/2024GL111490-2024>, 2024.

276 Phanikumar, D. V., Basha, G., Ratnam, M. V., Kondapalli, N. K., Ouarda, T. B. M. K., Pangaluru, K.:  
277 Assessment of particulate matter concentration and gaseous pollutants in urban and rural  
278 regions over the Emirate of Abu Dhabi, UAE. *Journal of Atmospheric and Solar-Terrestrial Physics*,  
279 199, 105217. <https://doi.org/10.1016/j.jastp.2020.105217-2020>, 2020.

280 Schwitalla, T., Branch, O., & Wulfmeyer, V.: Sensitivity study of the planetary boundary layer and  
281 microphysical schemes to the initialization of convection over the Arabian Peninsula. *Quarterly*  
282 *Journal of the Royal Meteorological Society*, 146(727), 846–869.  
283 <https://doi.org/10.1002/qj.3711-2020>, 2020.

284 Temimi, M., Fonseca, R., Nelli, N., Weston, M., Thota, M., Valappil, V., Branch, O., Wizemann, H.,  
285 Kumar Kondapalli, N., Wehbe, Y., Hosary, T. AL, Shalaby, A., Shamsi, N. AL, & Naqbi, H. AL.:  
286 Assessing the Impact of Changes in Land Surface Conditions on WRF Predictions in Arid Regions.  
287 *Journal of Hydrometeorology*, 2829–2853. <https://doi.org/10.1175/JHM-D-20-0083.1-2020>,  
288 2020.

289 Wang, Y., Bai, Y., Zhi, X., Wu, K., Zhao, T., Zhou, Y., Xiong, J., Zhu, S., Zhou, W., Hu, W., Zhang, L., &  
290 Meng, K.: Two Typical Patterns of Regional PM<sub>2.5</sub> Transport for Heavy Air Pollution Over Central  
291 China: Rapid Transit Transport and Stationary Accumulation Transport. *Frontiers in*  
292 *Environmental Science*, 10. <https://doi.org/10.3389/fenvs.2022.890514-2022>, 2022.



- 293 Wehbe, Y., Temimi, M., Weston, M., Chaouch, N., Branch, O., Schwitalla, T., Wulfmeyer, V., Zhan, X.,  
294 Liu, J., Al Mandous, A.: Analysis of an extreme weather event in a hyper-arid region using WRF-  
295 Hydro coupling, station, and satellite data. *Natural Hazards and Earth System Sciences*, 19, 1129-  
296 1149. <https://doi.org/10.5194/nhess-19-1129-2019>, 2019.
- 297 Weston, M., Chaouch, N., Valappil, V., Temimi, M., Ek, M., Zheng, W. (2018) Assessment of the  
298 sensitivity to the thermal roughness length in Noah and Noah-MP land surface model using WRF  
299 in an arid region. *Pure and Applied Geophysics*, 176, 2121-2137. [https://doi.org/10.1007/s00024-](https://doi.org/10.1007/s00024-018-1901-2-2018)  
300 [018-1901-2-2018](https://doi.org/10.1007/s00024-018-1901-2-2018), 2018.
- 301 Yousef, A. L., Temimi, M., Molini, A., Weston, M., Wehbe, Y., Al Mandous, A. (2020) Cloud Cover over  
302 the Arabian Peninsula from Global Remote Sensing and Reanalysis Products. *Atmospheric*  
303 *Research*, 238, 104866. <https://doi.org/10.1016/j.atmosres.2020.104866-2020>, 2020.
